# Supplementary material for: Preparation of thermostable and compatible citrate-based polyesters for enhancing the ultraviolet shielding performance of thermoplastic resin
Source: Royal Society of Chemistry journal article supplement (doi:10.1039/d0py01570a), 2021-01-01
Supplement: d0py01570a1.pdf [file d0py01570a1.pdf]

*Supporting information*

**Preparation of Thermostable and Compatible Citrate-based Polyester  
for Enhancing Ultraviolet Shielding Performance of Thermoplastic  
Resin**

Heng Chen,<sup>a</sup> Huan Liu,<sup>a</sup> Ming Chen,<sup>a</sup> Penghui Ge,<sup>a</sup> Shaojun Chen\*,<sup>b</sup> Hao Yuan\*

<sup>a</sup>Shenzhen Key Laboratory of Polymer Science and Technology, Guangdong Research Center for Interfacial Engineering of Functional Materials, College of Materials Science and Engineering, Shenzhen University, Shenzhen 518060, China

<sup>b</sup>ZTE Corporation, Shenzhen 518060, China

Corresponding authors.

E-mail addresses: chensj@szu.edu.cn (S. Chen), yuan.hao2@zte.com.cn (H. Yuan)

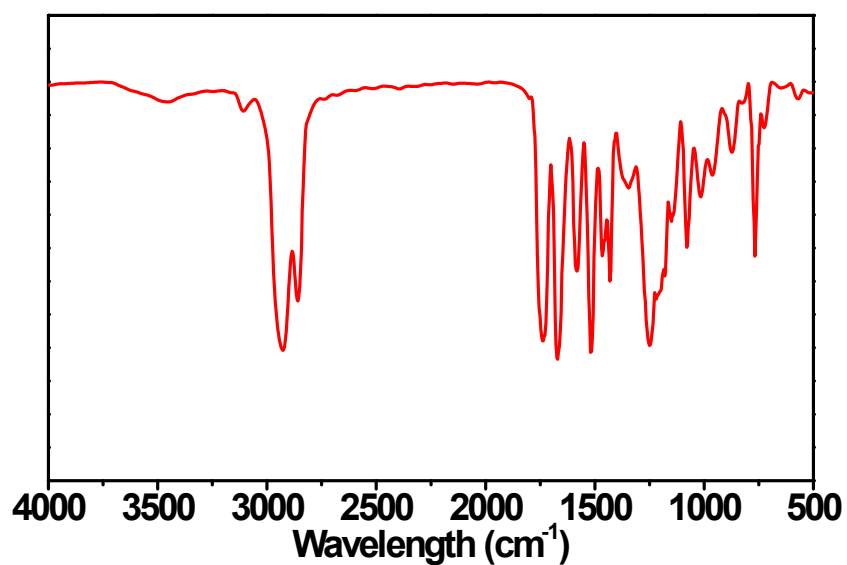

Fig. S1 FT-IR spectrum of DTPD.

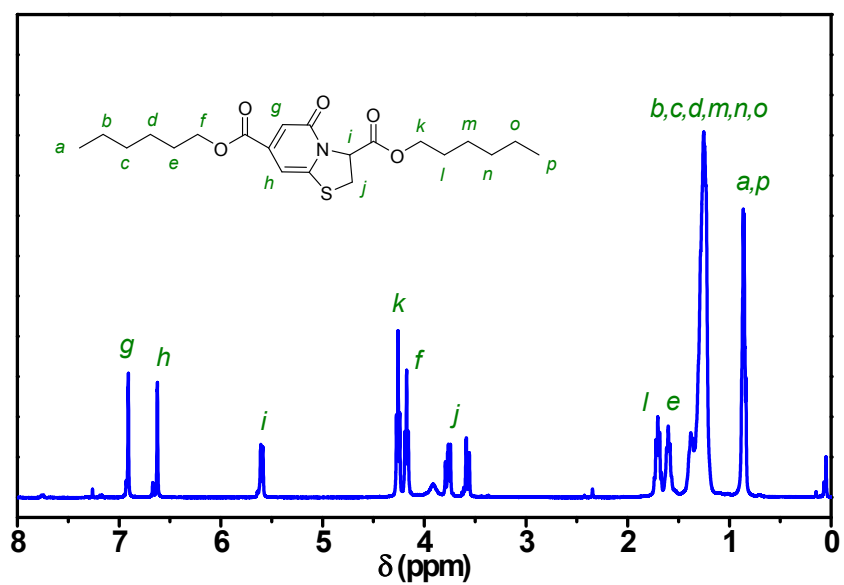

Fig. S2 <sup>1</sup>H NMR spectrum of DTPD.

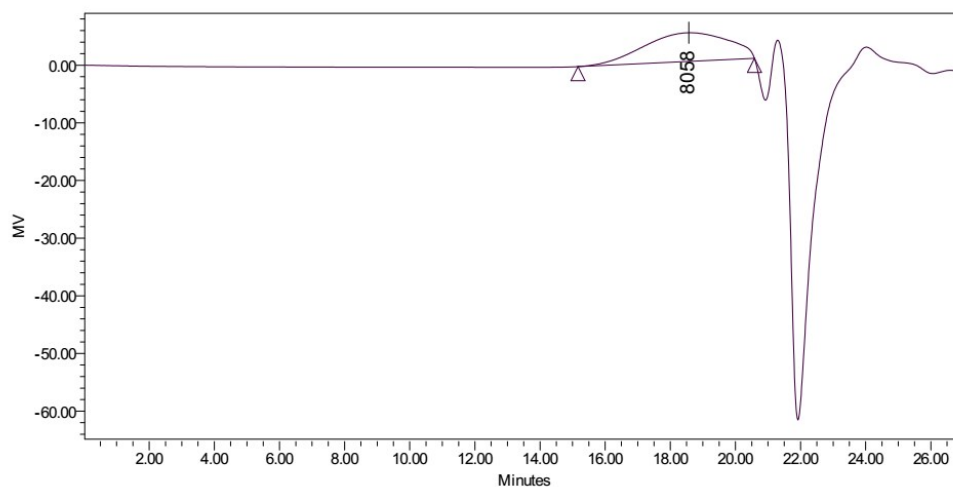

**Broad Unknown Modified Universal Peak Table**

|   | Distribution Name | Mv (Daltons) | K (dl/g) | alpha | Intrinsic Viscosity (dl/g) | Mn (Daltons) | Mw (Daltons) | MP (Daltons) | Mz (Daltons) | Mz+1 (Daltons) | Polydispersity | Mz/Mw    |
|---|-------------------|--------------|----------|-------|----------------------------|--------------|--------------|--------------|--------------|----------------|----------------|----------|
| 1 |                   |              |          |       |                            | 6501         | 9790         | 8058         | 13499        | 16921          | 1.505860       | 1.378783 |

**Fig. S3** Representative GPC curve of CPs (CP6).

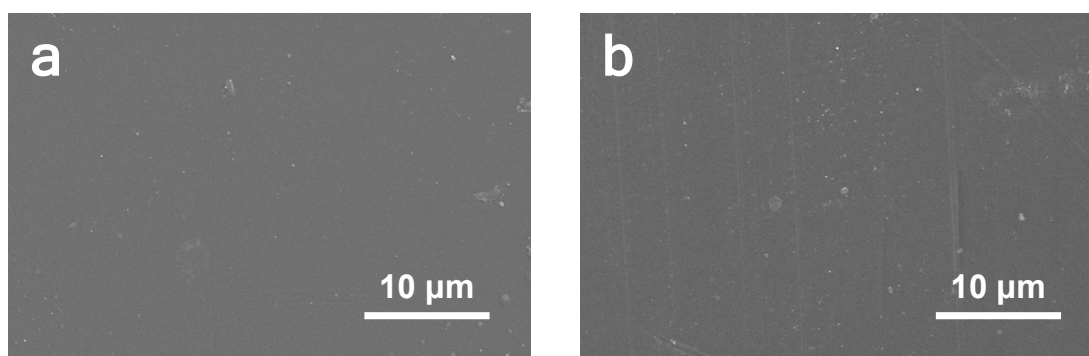

**Fig. S4** SEM images of PETG-0% (a) and PETG-2% film (b).
